# Supplementary material
Source: PubMed Central journal article supplement (PMC3499330)

## **Supplemental Material to:**

**Simone R. Witzmann, Jonathan D. Turner, Sophie B. Meriaux, Onno C. Meijer and Claude P. Muller**

**Epigenetic regulation of the glucocorticoid receptor promoter 17 in adult rats**

**Epigenetics 2012; 7(11)**

**<http://dx.doi.org/10.4161/epi.22363>**

**<http://www.landesbioscience.com/journals/epigenetics/article/22363>**

<http://www.landesbioscience.com/journals/epigenetics/2012EPI0228R-suptable1.xlsx>

<http://www.landesbioscience.com/journals/epigenetics/2012EPI0228R-suptable2.xlsx>

Supplementary Figure 1

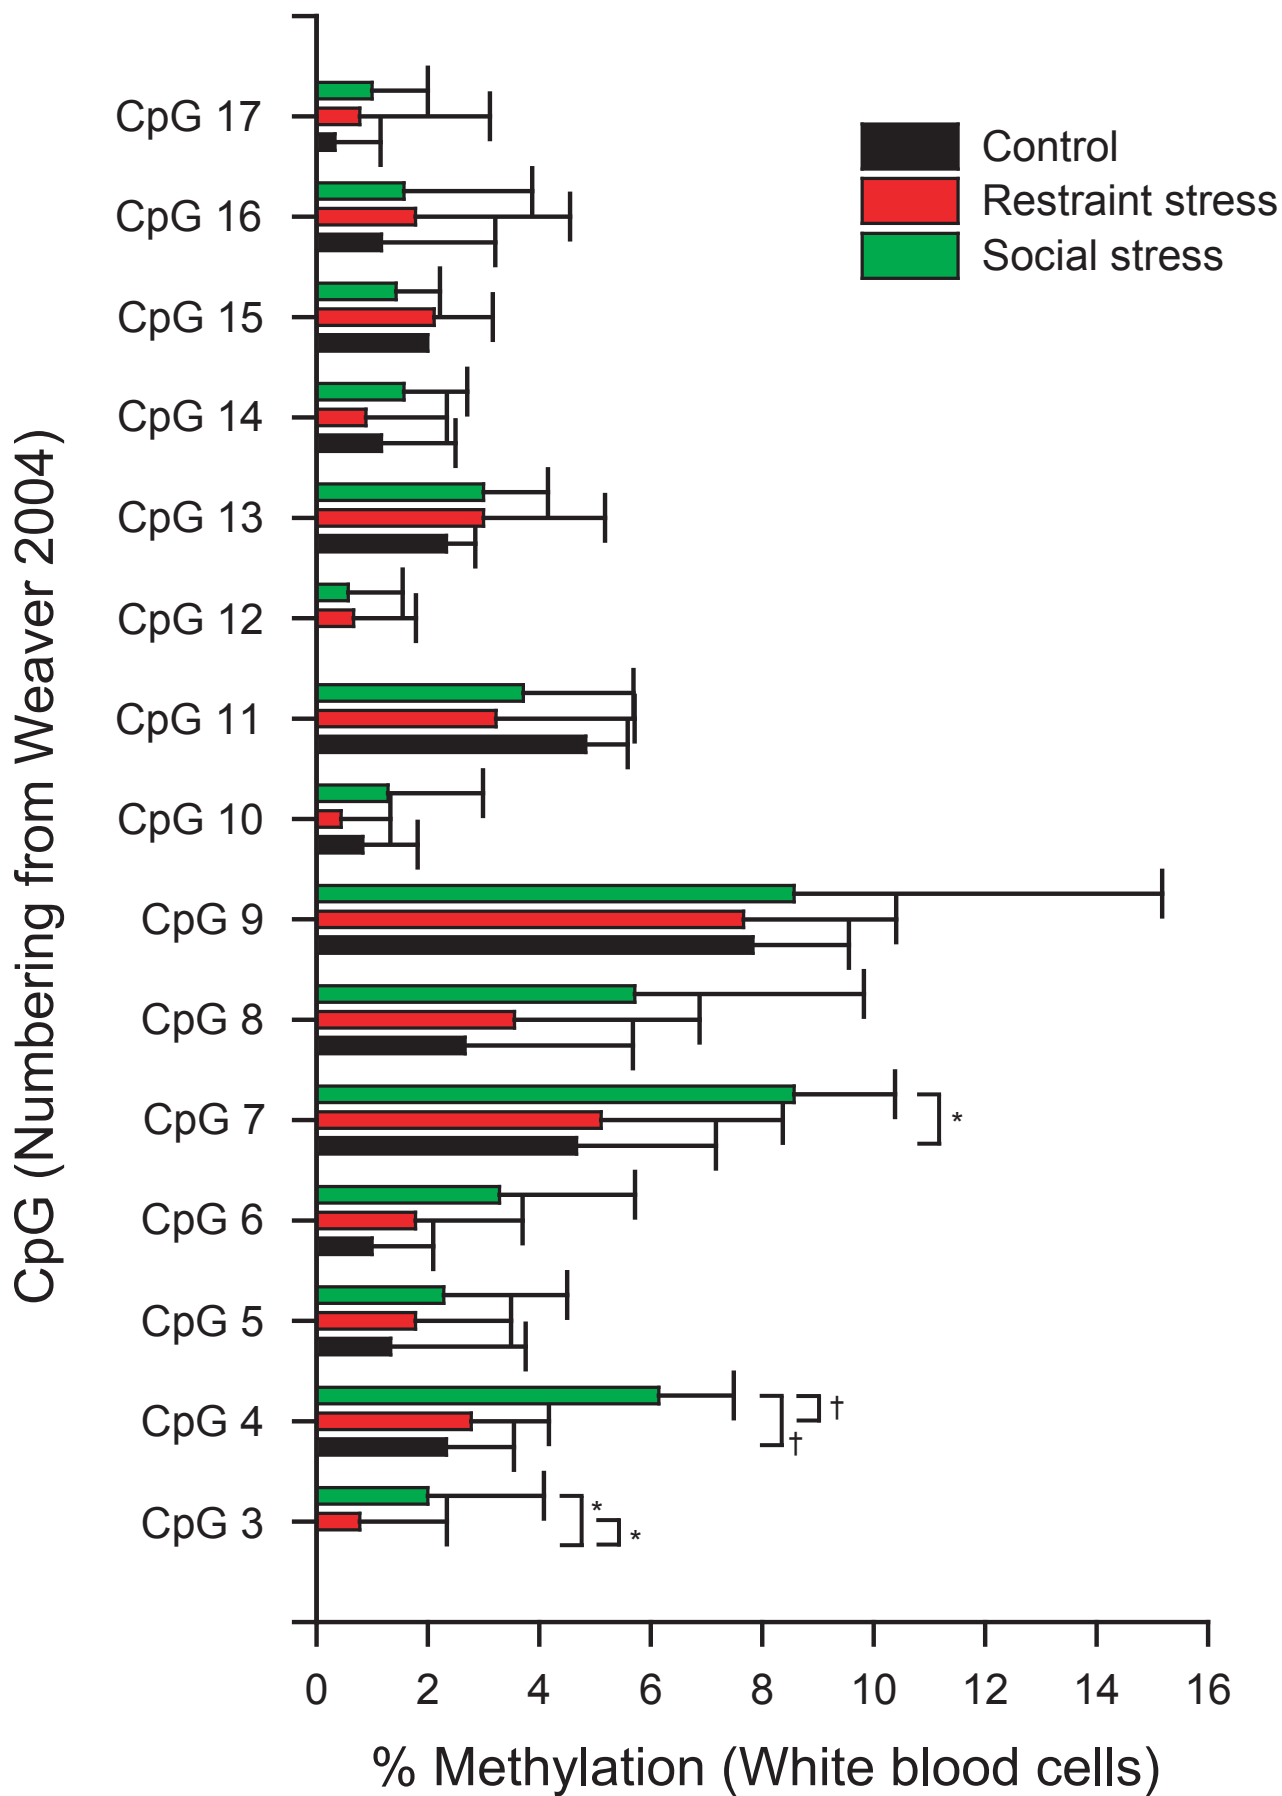

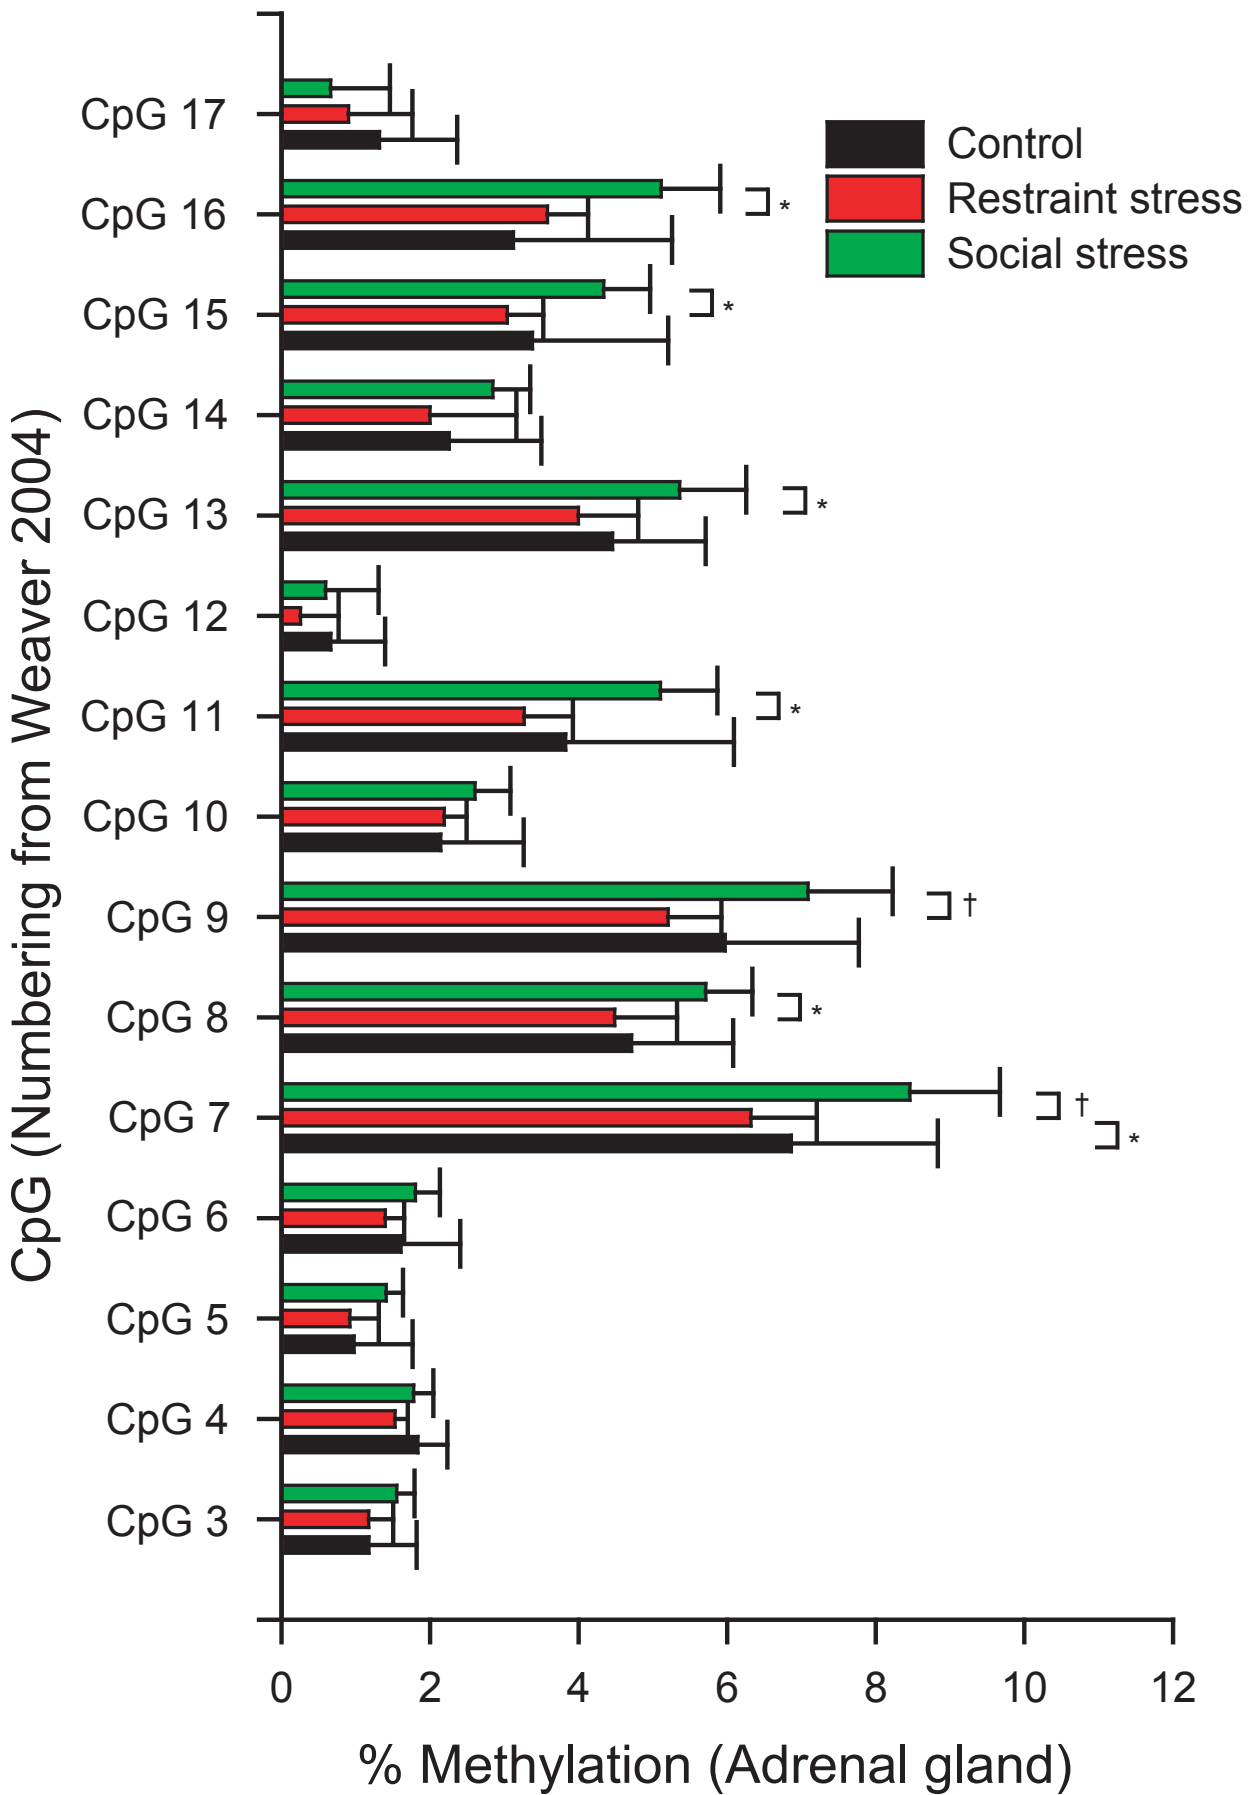

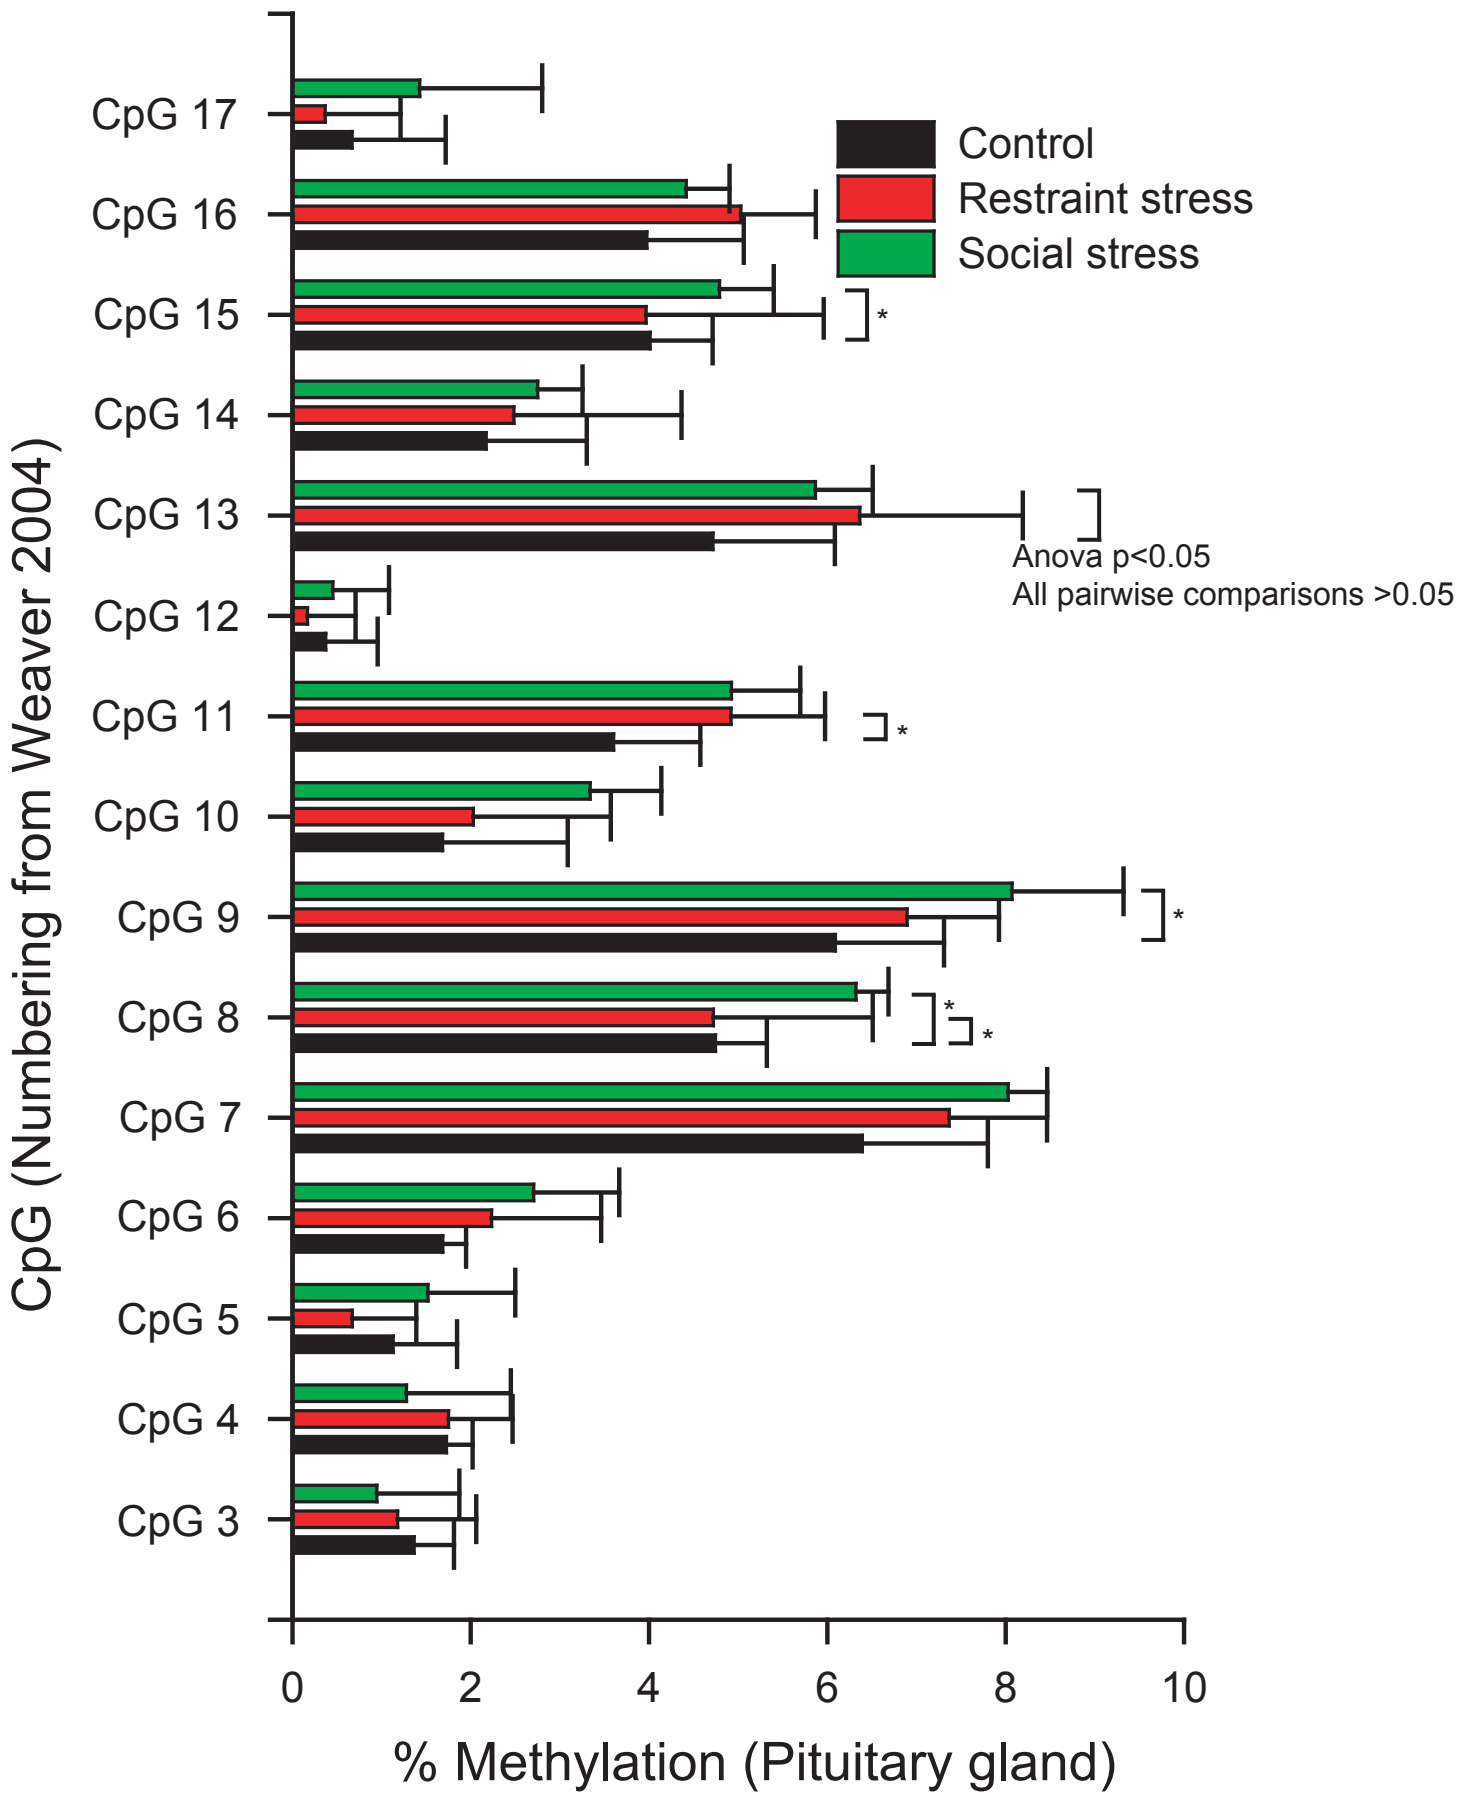

Supplement: epi-7-1290-s02.pdf [file epi-7-1290-s02.pdf]
